# Supplementary material for: Assessment of Clinical Micro-research training program based on the Kirkpatrick model
Source: Research Square preprint supplement (doi:10.21203/rs.3.rs-6403998/v1), 2025-05-20
Supplement: Supplementary file 1 [file 9d7e7d928bd99b3f267c62e5.docx]

**Supplementary File**

**Assessment of *Clinical Micro-research* training program based on the Kirkpatrick model**

**sTable 1** ‘*Clinical Micro-research’* course content

| Course order | Date | Content |
| --- | --- | --- |
| 1 | September 6th, 2023 | Overview of the clinical micro-research |
| 2 | September 8th, 2023 | Design of clinical micro-research |
| 3 | September 13th, 2023 | Literature search and reading |
| 4 | September 15th, 2023 | Example explanation of clinical micro-research |
| 5 | September 20th, 2023 | Clinical ethics application and registration |
| 6 | September 22nd, 2023 | Doctor-patient communication and follow-up skills |
| 7 | September 27th, 2023 | Data analysis of clinical micro-research |
| 8 | October 11th, 2023 | Chart production of clinical micro-research results |
| 9 | October 13th, 2023 | Case analysis of specialized disease database digging |
| 10 | October 18th, 2023 | Case analysis of public database digging |
| 11 | October 20th, 2023 | Patent design of clinical micro-research |
| 12 | October 25th, 2023 | Writing specifications for clinical micro-research papers |
| 13 | October 27th,2023 | Submission skills of clinical micro-research |
| 14 | November 1st, 2023 | Fund application skills |
| 15 | November 3rd, 2023 | Academic ethics |

**sTable 2. Scores for residents’ research proposals**

| **Items** | **Without training** | **With training** | **Statistic (t)** | **P value** |
| --- | --- | --- | --- | --- |
| Expert scores for research proposals | 72.9 ± 7.1 | 82.0 ± 6.6 | -2.648 | 0.019 |
